September 2014

# PSYCHIATRIC SERVICES

A Journal of the  
American Psychiatric  
Association

- ◆ Costs and Effectiveness of Mental Health Courts: Two New Investigations
- ◆ Learning Collaboratives in Mental Health Care: A Literature Review
- ◆ Assessing the Effects of Brief Incarcerations Before Jail Diversion
- ◆ Taking a Closer Look at Language Used by Mental Health Workers

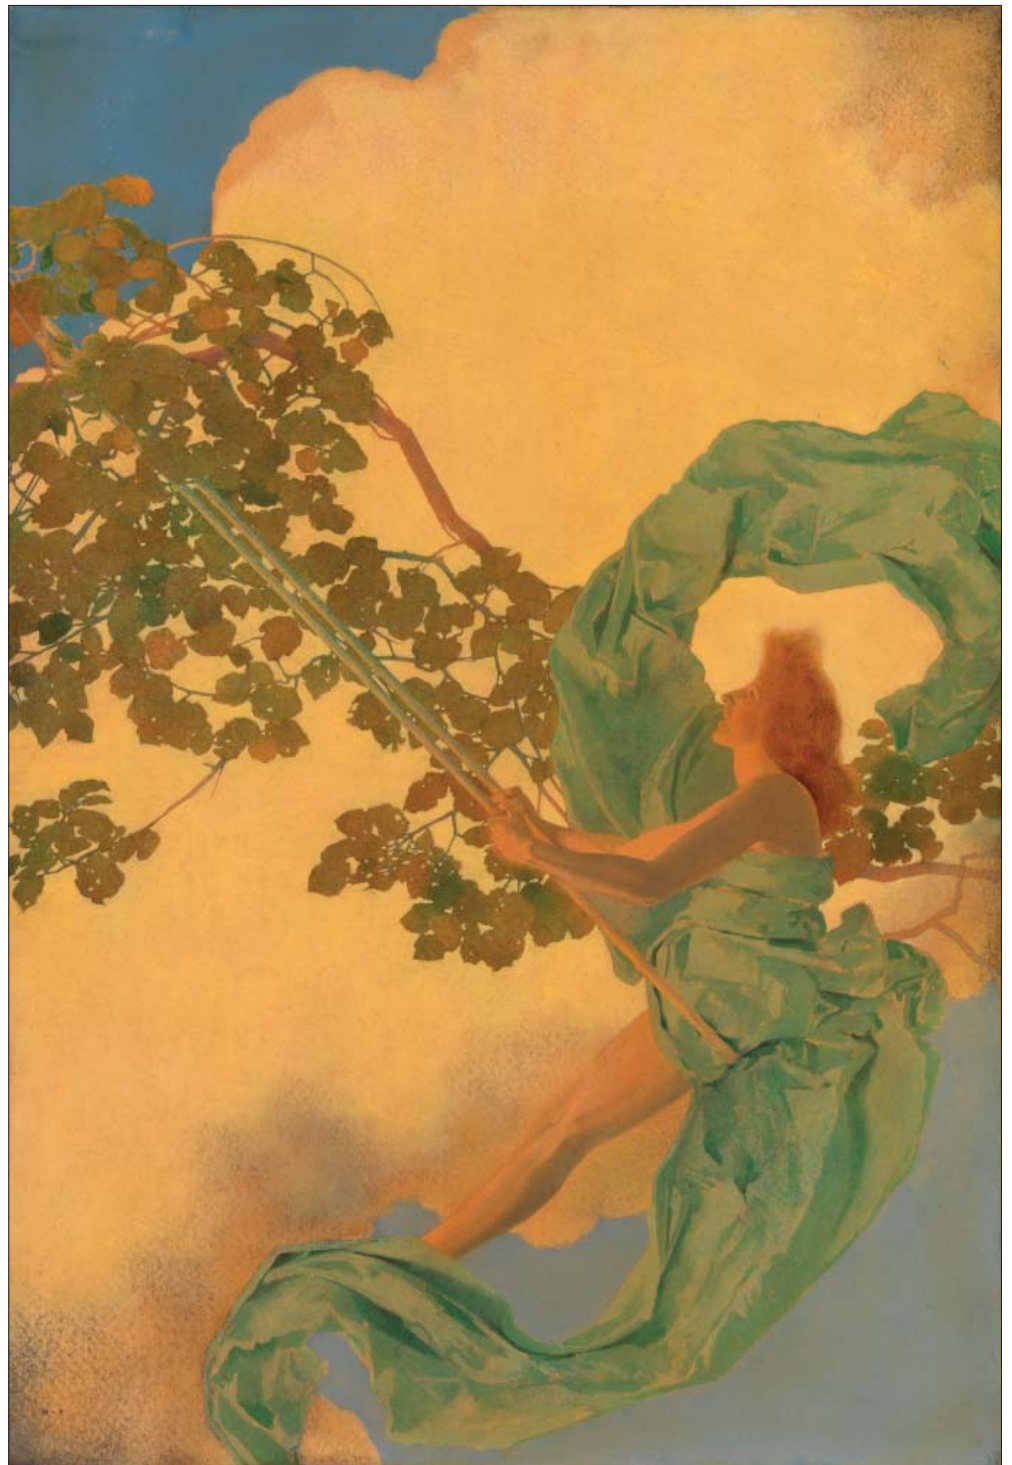

Source: https://ps.psychiatryonline.org/doi/suppl/10.1176/ps.2014.65.issue-9/suppl_file/cover.pdf
