# TAKING ISSUE

## How Do Mental Health Courts Work?

Mental health courts (MHCs), relative newcomers in the growing field of problem-solving courts, certainly seem like a good idea. Judges with special interest in justice-involved persons with mental illness clear court dockets for sessions focused on this selected group of arrestees, on the theory that treatment will reduce their criminal justice contacts. Using a variety of tools, the judges coach, cajole, and sometimes sanction the arrestees until they consistently engage in treatment, are less symptomatic, and avoid criminal justice contact.

This appealing but untested mechanism of action has led to spectacular growth of these courts. Unfortunately, this growth has come with little support or guidance from federal agencies or outcomes research. Key unanswered questions are whether MHCs can “work,” how they work, for whom, and under what conditions. Answers are surprisingly elusive, in part, because MHCs are inherently complex interventions, not easily amenable to simple randomized trials, in no small part because of the vexing diversity in how the courts operate—who they take in and how successfully they leverage the resources of treatment and service agencies well beyond their direct control. Most unclear is the courts’ capacity to leverage evidence-based treatments for justice-involved persons with complex comorbid conditions from woefully underresourced local behavioral health agencies.

In this month’s issue, Anestis and Carbonell’s study of a single court joins previous studies reporting that MHCs can reduce criminal justice recidivism, but generally without presenting evidence that the mechanism of action is via improved mental health status, which has led some to conclude that these courts exert their effects mainly by coaching their clients about avoiding criminogenic behaviors. In another report in this month’s issue, Steadman and coauthors conclude that reductions in criminal justice involvement do not offset the increased costs of mental health treatment incurred when these previously undertreated individuals are engaged in treatment.

One might conclude from both studies that spending more on mental health treatment for these individuals is a nonessential luxury when the court intervention itself seems to reduce recidivism with no measurable mental health benefit. Such conclusions would be vastly premature. Few studies of MHCs have been adequately resourced to directly and longitudinally assess the mental health functioning of court attendees, the appropriateness of the treatment they receive, and the extent to which the treatment comports with evidence-based models. Further, many court attendees have been disengaged from treatment altogether and therefore might only “save money” if their criminal justice incarceration costs were very high to start with. It is time to dig even deeper and carry out additional well-conducted studies of the effectiveness of MHCs.—MARVIN S. SWARTZ, M.D., *Department of Psychiatry and Behavioral Sciences, Duke University Medical Center, Durham, North Carolina*

*Psychiatric Services*, established in 1950, is published monthly by the American Psychiatric Association for mental health professionals and others concerned with treatment and services for persons with mental illnesses and mental disabilities, in keeping with APA’s objectives to improve care and treatment, to promote research and professional education in psychiatric and related fields, and to advance the standards of all psychiatric services and facilities.

### Editor

Howard H. Goldman, M.D., Ph.D.

### Editorial Board

David A. Adler, M.D.

Regina Bussing, M.D., M.S.H.S.

Javier I. Escobar, M.D.

Stephen M. Goldfinger, M.D.

Richard K. Harding, M.D.

Marcela Horvitz-Lennon, M.D., M.P.H.

Roberto Lewis-Fernández, M.D.

Ramin Mojtabai, M.D., Ph.D.

Mark R. Munetz, M.D.

Martha Sajatovic, M.D.

Gregory E. Simon, M.D., M.P.H.

T. Scott Stroup, M.D., M.P.H.

### Editor Emeritus

John A. Talbott, M.D.

### Book Review Editor

Jeffrey L. Geller, M.D., M.P.H.

### Contributing Editors

Paul S. Appelbaum, M.D., *Law & Psychiatry*

José Miguel Caldas de Almeida, M.D., and Matt Muijen, M.D., Ph.D., *Global Mental Health Reforms*

Francine Cournos, M.D., and Stephen M. Goldfinger, M.D., *Frontline Reports*

Lisa B. Dixon, M.D., M.P.H., and Brian Hepburn, M.D., *Research and Services Partnerships*

Benjamin G. Druss, M.D., M.P.H., *Integrated Care*

Jeffrey L. Geller, M.D., M.P.H., *Personal Accounts*

Marcela Horvitz-Lennon, M.D., M.P.H., *Best Practices*

Amy M. Kilbourne, Ph.D., M.P.H., and Tami L. Mark, Ph.D., *Datapoints*

Fred C. Osher, M.D., and Marvin S. Swartz, M.D., *State Mental Health Policy*

Jules M. Ranz, M.D., Susan M. Deakins, M.D., and Stephanie Le Melle, M.D., *Case Studies in Public-Sector Leadership*

Steven S. Sharfstein, M.D., Haiden A. Huskamp, Ph.D., and Alison Evans Cuellar, Ph.D., *Economic Grand Rounds*

### Statistical Consultant

Deborah R. Medoff, Ph.D.

### Editorial Consultants

Joseph M. Cerimele, M.D.

Julie M. Donohue, Ph.D.

Robert E. Drake, M.D., Ph.D.

M. Susan Ridgely, J.D.

Laura Van Tosh

### Editorial Staff

Constance Grant Gartner, *Managing Editor*

Demarie S. Jackson, *Associate Editor*

Kathleen Stearman, *Associate Editor*

Wendy Lieberman Taylor, *Production Manager*

Y. Nicole Gray, *Editorial Support Services Manager*

### Publisher

Rebecca D. Rinehart

### American Psychiatric Association

Paul Summergrad, M.D., *President*

Renée L. Binder, M.D., *President-Elect*

Maria A. Oquendo, M.D., *Secretary*

Frank Brown, M.D., *Treasurer*

Jenny L. Boyer, M.D., Ph.D., J.D., *Speaker, APA Assembly*

Saul Levin, M.D., M.P.A., *Chief Executive Officer and Medical Director*
